# Supplementary material for: SNP-based pathway enrichment analysis for genome-wide association studies
Source: Springer Nature journal article supplement (doi:10.1186/1471-2105-12-99), 2011-04-15

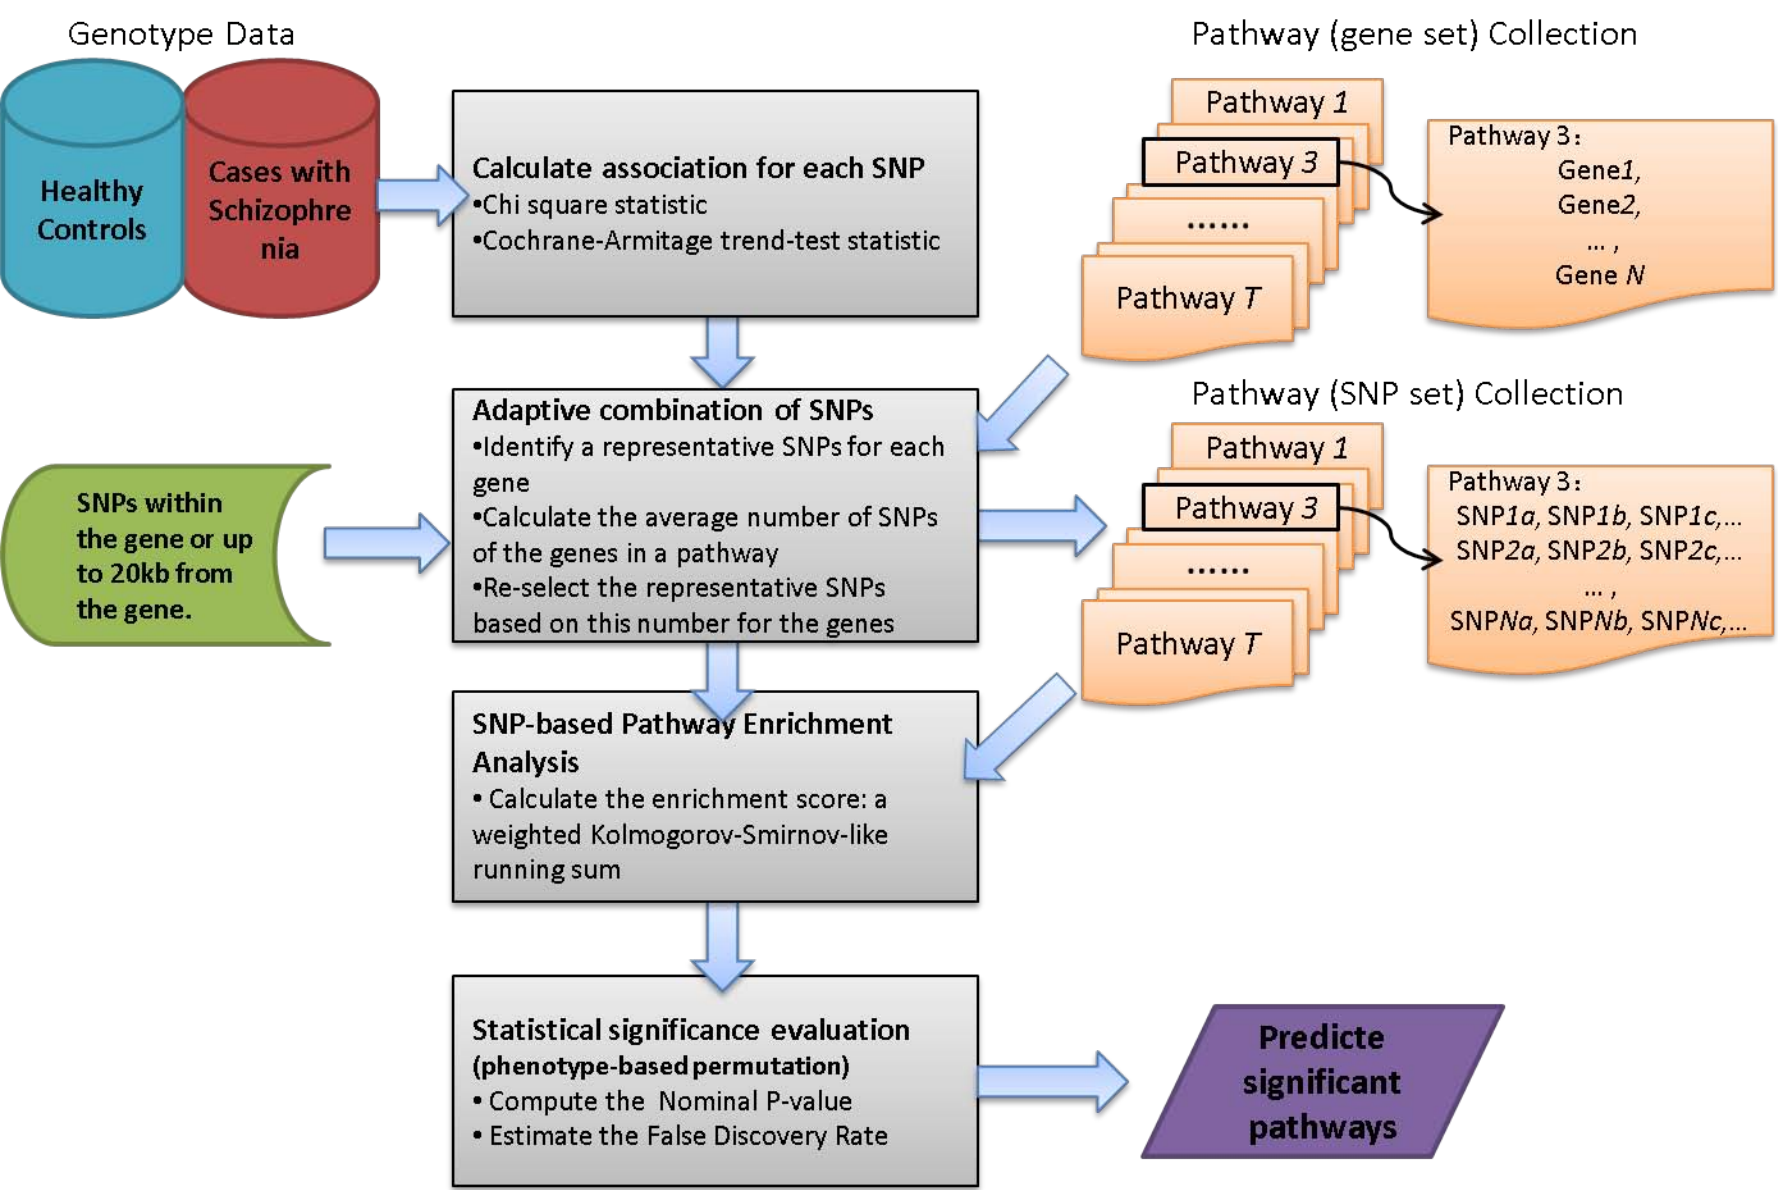

Supplement: 12859_2010_4495_MOESM3_ESM.pdf [file 12859_2010_4495_MOESM3_ESM.pdf]
